# Supplementary material for: Interrogation of the cellular immunome of cancer patients with regard to the COVID-19 pandemic
Source: PubMed Central journal article supplement — J Immunother Cancer. 2021 Mar 11;9(3):e002087. doi: 10.1136/jitc-2020-002087 (PMC7956734; doi:10.1136/jitc-2020-002087), 2021-03-11
Supplement: jitc-2020-002087supp001.pdf [file jitc-2020-002087supp001.pdf]

## Supplemental Table S1 Complete list of 123 peripheral immune cell subsets analyzed by flow cytometry

Nine standard subsets were identified as well as 114 subsets relating to maturation and function within the standard subsets. Lepone [ref 18].

### 1. Total CD4<sup>+</sup> T cells

- PD-L1<sup>+</sup> CD4
- PD-1<sup>+</sup> CD4
- EOMES<sup>+</sup> CD4
- TCR<sup>+</sup> CD4
- Tbet<sup>+</sup> CD4
- BATF<sup>+</sup> CD4
- CTLA-4<sup>+</sup> CD4
- Tim-3<sup>+</sup> CD4
- ICOS<sup>+</sup> CD4
  - PD-L1<sup>+</sup> ICOS<sup>+</sup> CD4
  - PD-1<sup>+</sup> ICOS<sup>+</sup> CD4
- Total naïve (CCR7<sup>+</sup>CD45RA<sup>+</sup>) CD4
  - PD-L1<sup>+</sup> naïve CD4
  - PD-1<sup>+</sup> naïve CD4
  - CTLA-4<sup>+</sup> naïve CD4
  - Tim-3<sup>+</sup> naïve CD4
- Total central memory (CCR7<sup>+</sup>CD45RA<sup>-</sup>) CD4
  - PD-L1<sup>+</sup> CM CD4
  - PD-1<sup>+</sup> CM CD4
  - CTLA-4<sup>+</sup> CM CD4
  - Tim-3<sup>+</sup> CM CD4
- Total effector memory (CCR7<sup>-</sup>CD45RA<sup>-</sup>) CD4
  - PD-L1<sup>+</sup> EM CD4
  - PD-1<sup>+</sup> EM CD4
  - CTLA-4<sup>+</sup> EM CD4
  - Tim-3<sup>+</sup> EM CD4
- Total EMRA (CCR7<sup>-</sup>CD45RA<sup>+</sup>) CD4
  - PD-L1<sup>+</sup> EMRA CD4
  - PD-1<sup>+</sup> EMRA CD4
  - CTLA-4<sup>+</sup> EMRA CD4
  - Tim-3<sup>+</sup> EMRA CD4

### 2. Total CD8<sup>+</sup> T cells

- PD-L1<sup>+</sup> CD8
- PD-1<sup>+</sup> CD8
- EOMES<sup>+</sup> CD8
- TCR<sup>+</sup> CD8
- Tbet<sup>+</sup> CD8
- BATF<sup>+</sup> CD8
- CTLA-4<sup>+</sup> CD8
- Tim-3<sup>+</sup> CD8

- Total naïve (CCR7<sup>+</sup>CD45RA<sup>+</sup>) CD8
  - PD-L1<sup>+</sup> naïve CD8
  - PD-1<sup>+</sup> naïve CD8
  - CTLA-4<sup>+</sup> naïve CD8
  - Tim-3<sup>+</sup> naïve CD8
- Total central memory (CCR7<sup>+</sup>CD45RA<sup>-</sup>) CD8
  - PD-L1<sup>+</sup> CM CD8
  - PD-1<sup>+</sup> CM CD8
  - CTLA-4<sup>+</sup> CM CD8
  - Tim-3<sup>+</sup> CM CD8
- Total effector memory (CCR7<sup>-</sup>CD45RA<sup>-</sup>) CD8
  - PD-L1<sup>+</sup> EM CD8
  - PD-1<sup>+</sup> EM CD8
  - CTLA-4<sup>+</sup> EM CD8
  - Tim-3<sup>+</sup> EM CD8
- Total EMRA (CCR7<sup>-</sup>CD45RA<sup>+</sup>) CD8
  - PD-L1<sup>+</sup> EMRA CD8
  - PD-1<sup>+</sup> EMRA CD8
  - CTLA-4<sup>+</sup> EMRA CD8
  - Tim-3<sup>+</sup> EMRA CD8

### 3. Total Tregs

- PD-L1<sup>+</sup> Tregs
- PD-1<sup>+</sup> Tregs
- CTLA-4<sup>+</sup> Tregs
- ICOS<sup>+</sup> Tregs
- CD45RA<sup>+</sup> Tregs
- CD49d<sup>+</sup> Tregs

### 4. Total B cells

- PD-L1<sup>+</sup> B cells
- PD-1<sup>+</sup> B cells
- CTLA-4<sup>+</sup> B cells
- Tim-3<sup>+</sup> B cells

### 5. Total NK

- PD-L1<sup>+</sup> NK
- PD-1<sup>+</sup> NK
- Tim-3<sup>+</sup> NK
- Total mature (CD16<sup>+</sup> CD56<sup>dim</sup>) NK
  - PD-L1<sup>+</sup> mature NK
  - PD-1<sup>+</sup> mature NK
  - Tim-3<sup>+</sup> mature NK
- Total functional intermediate (CD16<sup>+</sup> CD56<sup>br</sup>) NK

- PD-L1<sup>+</sup> functional intermediate NK
- PD-1<sup>+</sup> functional intermediate NK
- Tim-3<sup>+</sup> functional intermediate NK
- Total immature (CD16<sup>-</sup> CD56<sup>br</sup>) NK
  - PD-L1<sup>+</sup> immature NK
  - PD-1<sup>+</sup> immature NK
  - Tim-3<sup>+</sup> immature NK
- Total unconventional (CD16<sup>-</sup> CD56<sup>dim</sup>) NK
  - PD-L1<sup>+</sup> unconventional NK
  - PD-1<sup>+</sup> unconventional NK
  - Tim-3<sup>+</sup> unconventional NK

### 6. Total NK-T

- PD-L1<sup>+</sup> NK-T
- PD-1<sup>+</sup> NK-T
- Tim-3<sup>+</sup> NK-T

### 7. Total cDC

- PD-L1<sup>+</sup> cDC
- PD-1<sup>+</sup> cDC
- CD83<sup>+</sup> cDC
- Tim-3<sup>+</sup> cDC

### 8. Total pDC

- PD-L1<sup>+</sup> pDC
- PD-1<sup>+</sup> pDC
- CD83<sup>+</sup> pDC
- Tim-3<sup>+</sup> pDC

### 9. Total MDSC

- PD-L1<sup>+</sup> MDSC
- PD-1<sup>+</sup> MDSC
- CD16<sup>+</sup> MDSC
- Total monocytic (CD14<sup>+</sup> CD15<sup>-</sup>) MDSC
  - PD-L1<sup>+</sup> mMDSC
  - PD-1<sup>+</sup> mMDSC
  - CD16<sup>+</sup> mMDSC
- Total granulocytic (CD14<sup>-</sup> CD15<sup>+</sup>) MDSC
  - PD-L1<sup>+</sup> gMDSC
  - PD-1<sup>+</sup> gMDSC
  - CD16<sup>+</sup> gMDSC
- Total lineage negative (CD14<sup>-</sup> CD15<sup>-</sup>) MDSC
  - PD-L1<sup>+</sup> lin neg MDSC
  - PD-1<sup>+</sup> lin neg MDSC
  - CD16<sup>+</sup> lin neg MDSC

BATF, basic leucine zipper transcription factor ATF-like; cDC, conventional dendritic cells; CM, central memory; CTLA-4, cytotoxic T lymphocyte-associated protein-4; EM, effector memory; EMRA, terminally differentiated effector memory; EOMES, eomesodermin; FoxP3, forkhead box P3; gMDSCs, granulocytic myeloid derived suppressor cells; ICOS, inducible T cell co-stimulator; lin neg MDSCs, lineage negative MDSCs; mMDSCs, monocytic MDSCs; NK, natural killer; pDC, plasmacytoid DC; PD-1, programmed cell death-1; PD-L1, programmed cell death ligand-1; Tbet, T box expressed in T cells; TCR, T cell receptor; Tim-3, T cell immunoglobulin and mucin domain-3; Tregs, regulatory T cells.
