# Supplementary material for: Interrogation of the cellular immunome of cancer patients with regard to the COVID-19 pandemic
Source: PubMed Central journal article supplement — J Immunother Cancer. 2021 Mar 11;9(3):e002087. doi: 10.1136/jitc-2020-002087 (PMC7956734; doi:10.1136/jitc-2020-002087), 2021-03-11
Supplement: jitc-2020-002087supp002.pdf [file jitc-2020-002087supp002.pdf]

**Supplemental Table S2: Studies included for immunome analysis**

| <b>NCT #</b>   | <b>n=68</b> |
|----------------|-------------|
| NCT01772004*   | 34          |
| NCT02517398    | 2           |
| NCT02933255    | 3           |
| NCT02994953    | 2           |
| NCT03493945    | 1           |
| Healthy Donors | 26          |

\*Source for all analyses of advanced cancer patients with the exception of Figure 4, which includes data from all listed trials.
