# Supplementary material for: Interrogation of the cellular immunome of cancer patients with regard to the COVID-19 pandemic
Source: PubMed Central journal article supplement — J Immunother Cancer. 2021 Mar 11;9(3):e002087. doi: 10.1136/jitc-2020-002087 (PMC7956734; doi:10.1136/jitc-2020-002087), 2021-03-11
Supplement: jitc-2020-002087supp003.pdf [file jitc-2020-002087supp003.pdf]

**Supplemental Table S3: Patient demographics**

| <b>Baseline Characteristics</b>    | <b>n = 68</b> |
|------------------------------------|---------------|
| <b>Age (years): Median (Range)</b> | 59 (18-79)    |
| <b>Gender: # (%)</b>               |               |
| Male                               | 41 (60.3)     |
| Female                             | 27 (39.7)     |
| <b>Race/Ethnicity: # (%)</b>       |               |
| White                              | 50 (73.5)     |
| African-American                   | 9 (13.2)      |
| Asian                              | 2 (2.9)       |
| Hispanic                           | 1 (1.5)       |
| Other*                             | 6 (8.8)       |
| <b>Disease Status: # (%)</b>       |               |
| Healthy donor                      | 26 (38.2)     |
| Advanced cancer                    | 42 (61.8)     |

\*Three each for Multiple and Unknown.
